# Supplementary material for: The owl sensor: a ‘fragile’ DNA nanostructure for the analysis of single nucleotide variations
Source: Royal Society of Chemistry journal article supplement (doi:10.1039/c8nr01107a), 2018-01-01
Supplement: c8nr01107a1.pdf [file c8nr01107a1.pdf]

## SUPPORTING INFORMATION

### The Owl Sensor: a ‘Fragile’ DNA Nanostructure for Analysis of Single Nucleotide Variations

Rebekah J. Karadeema,<sup>†‡\*</sup> Maria Stancescu,<sup>†</sup> Tyler P. Steidl,<sup>†</sup> Sophia C. Bertot,<sup>†</sup> and Dmitry M. Kolpashchikov<sup>†\*\*</sup>

<sup>†</sup>Chemistry Department, University of Central Florida, Orlando, FL 32816, USA.

<sup>‡</sup>Current address: Department of Chemistry, The Scripps Research Institute, 10550 North Torrey Pines Road, La Jolla, California 92037, United States

<sup>‡</sup>Burnett School of Biomedical Sciences, University of Central Florida, Orlando, 32816, Florida, USA

E-mail: [rebekah@scripps.edu](mailto:rebekah@scripps.edu); [dmitry.kolpashchikov@ucf.edu](mailto:dmitry.kolpashchikov@ucf.edu)

| Table of Contents                                                                                                               | Page  |
|---------------------------------------------------------------------------------------------------------------------------------|-------|
| 1. Materials and Methods                                                                                                        | 2-3   |
| 2. Table S1. Oligonucleotide sequences used in the study                                                                        | 4-5   |
| 3. Secondary structure of <b>InhC</b> analyte                                                                                   | 6     |
| 4. Melting curves for <b>R<sub>10</sub>/P<sub>Y</sub></b> Owl Sensors in complex with <b>InhC</b> and <b>InhT</b> analytes      | 7     |
| 5. Melt curves complexes of <b>R<sub>X</sub>/P<sub>9</sub></b> ( $X = 8, 9, 11, 12$ ) with <b>InhC</b> and <b>InhT</b> analytes | 8     |
| 6. Melting curves for MB and linear probe - <b>Inh</b> analyte complexes                                                        | 9     |
| 7. Differentiation of SNV by the <b>R<sub>10</sub>/P<sub>9</sub></b> Owl Sensor                                                 | 10    |
| 8. Selectivity of <b>R<sub>10</sub>/P<sub>9</sub></b> specific to <b>InhT</b> analyte                                           | 11    |
| 9. Limit of Detection for the <b>R<sub>10</sub>/P<sub>9</sub></b> Owl Sensor                                                    | 12    |
| 10. Differentiation of the Owl Sensor with outside TEG Linkers                                                                  | 13-14 |
| 11. Differentiation of the Owl Sensor with inside TEG Linkers                                                                   | 15    |
| 12. Differentiation of the Owl Sensor with inside and outside TEG Linkers                                                       | 16    |
| 13. Table S2. Temperature differentiation ranges for Owl Sensor and other probes                                                | 17    |
| 14. Table S3. Differentiation Ranges for Owl Sensor <b>R<sub>X</sub>/P<sub>9</sub></b>                                          |       |
| 15. Differentiation of <b>Inh_C</b> and <b>Inh_T</b> analytes by X sensor                                                       | 19    |
| 16. Owl sensors performance with RNA Inh-related analytes                                                                       | 20    |
| 17. Owl Sensor optimized performance with RNA Inh-related analytes                                                              | 21    |
| 18. Structures of Owl Sensors in complex with <b>miDNA99a</b> analytes                                                          | 22    |
| 19. Secondary Structures of <b>miDNA99a</b> and <b>miDNA100</b>                                                                 | 23    |
| 20. Melting temperature of different Owl sensors with <b>miDNA</b> analytes                                                     | 24    |
| 21. Optimized melting temperature conditions for <b>miDNA</b> analytes                                                          | 25    |
| 22. Owl Sensors performance with <b>miRNA99</b> and <b>miRNA100</b> analytes                                                    | 26    |
| 23. Optimized melt curves and differentiation of <b>miRNA</b> analytes                                                          | 27    |
| 24. Effect of the presence of random RNA on the performance of Owl Sensor.                                                      | 28    |
| 25. References                                                                                                                  | 29    |

## 1. Materials and Methods

**Reagents.** All buffers and stock solutions were made with DNase/protease-free water purchased from Fisher Scientific Inc. (Pittsburg, PA). All other reagents needed for buffers were purchased from Sigma-Aldrich (St. Louis, MO). The **UMB1** was custom-made by TriLink Biotechnologies, Inc. (San Diego, CA). All other oligonucleotides (sequences listed in SI Table 7) were obtained from Integrated DNA Technologies, Inc. (Coraville, IA). The concentrations of nucleic acid strands were determined using the Beer-Lambert law, a 1 cm quartz cuvette (volume of 100  $\mu$ L), and extinction coefficients determined by using OligoAnalyzer 3.1 software (Integrated DNA Technologies, Inc.). Three independent and different amounts of the same oligonucleotide were mixed with water to total volume of 100  $\mu$ L and tested for their absorbance values at 260 nm using a Perkin-Elmer Lambda 35 UV/Vis spectrometer (San Jose, CA). The average of the concentrations calculated was used with relative standard deviations of each sample less than 10%. Working stock solutions of convenience concentrations were prepared for all sequences and stored frozen at -20°C until use.

**Melt Curve Fluorescent Assays.** Prior to mixing, stock solutions of oligonucleotides were allowed to thaw to room temperature, vortexed for 5 s, and centrifuged on a tabletop minicentrifuge for 10 s. A master mix solution containing  $R_X/P_Y$  was created such that adding 11.5  $\mu$ L of the master mix to the samples (to a total volume of 25  $\mu$ L) would result in  $R_X$  and  $P_Y$  concentrations of 150 nM and 200 nM, respectively. For miDNA/RNA analytes,  $R_{x\_mi}$  and  $P_{y\_mi}$  concentrations were 1  $\mu$ M and 200 nM, respectively. The master mix was used to make samples with the following names: Control, Mismatched, Matched, and Insertion and Deletion, if tested. The master mix solution (11.5  $\mu$ L) was added to a 96-well plate (30  $\mu$ L wells). Next, 1  $\mu$ L of water, matched, mismatched, **Inh\_del**, or **Inh\_ins** was added to the plate to make the Control, Mismatched, Matched, Deletion, or Insertion samples, respectively so that the final concentration of the analyte was 100 nM. Another well was filled with 12.5  $\mu$ L of water to serve as a control named 'UMB'.

The buffer used contained 50 mM Tris-HCl, pH 7.4, 50 mM MgCl<sub>2</sub>, and 0.1% Tween-20 with the **UMB** and ROX unless otherwise specified. A buffer-fluorophore solution containing 2X Buffer, 100 nM **UMB** and ROX was made. By adding 12.5  $\mu$ L of the buffer-fluorophore solution to each sample well, final concentrations of the fluorophores were 50 nM. ROX was used as a passive dye reference since its fluorescence shows little fluctuation with temperature. Using ROX also allows for correction of well-to-well and plate-to-plate variations in fluorescence detection. Fluorescence was reported as  $F_{FAM}/F_{ROX}$ , where  $F_{FAM}$  is the fluorescence given off by the fluorophore attached to **UMB1** and  $F_{ROX}$  is the fluorescence of the ROX reference dye.

After samples were made, an optical adhesive cover was placed firmly on top of the plate and a tool was used to seal the wells. The plate was flicked to eliminate any formed bubbles, vortexed, and then spun at 660 rcf for 20 s. The solutions were placed in the QuantStudio™ 6 Flex System and cooled (2°C/s) from room temperature to 5°C where they were annealed for 60 min. The fluorescence of the samples was then read continuously as the samples were heated (0.1°C/s) from 5°C to 95°C. The QuantStudio™ 6 Flex System software allowed for the selection of FAM™ dye to be read as the 'Target' and if ROX was utilized, it was selected as a 'Passive Reference'. The system was routinely calibrated for well factors, background, and dye fluorescence. It is important to note that samples taken after different calibrations of the system showed altered background fluorescence of UMB and the Control samples (with no analyte present); thus depending on the date the experiment was conducted, some variation in fluorescent values between experiments may be observed. The QuantStudio™ Real-Time

---

PCR Software (version 1.1) allows for real-time data analysis for initial processing, but all relevant data was exported to Excel for further analysis. The readings from at least two wells were averaged and replotted to produce the presented figures. The derivative of fluorescence over time was calculated by the QuantStudio™ Real-Time PCR Software. The maximum of the derivative plots gives the inflection point of the curve, also called the melting temperature ( $T_m$ ).

*Kinetic Studies.* The concentration of Owl Sensor strands were the same as previously mentioned for fluorescent assays. To see how the Owl Sensor behaves over 24 hrs at one temperature, an altered protocol was required. Because more change in fluorescence is observed right after mixing, data was collected every 20 or 30 s for the first 1-2 hours. After that, longer periods of time were given between fluorescent readings (20 to 30 min) until 24 hrs had passed. This was achieved through 2 PCR stages. The first stage cooled the samples from 25°C to the desired temperature at 1.6°C/s. The temperature was then kept constant as the system repeatedly recorded fluorescent readings at short intervals (20 to 30 s between readings). The second PCR stage remained at the same temperature as the first and fluorescent readings were repeatedly recorded at slower intervals (20 to 30 min). Data was exported to Excel and analyzed.

*Limit of Detection.* The limit of detection (LOD) was determined by conducting fluorescence experiments using a 100  $\mu$ L quartz in a Perkin-Elmer (San Jose, CA) LS-5S Luminescence Spectrophotometer with a Hamamatsu xenon lamp ( $\lambda_{ex} = 485$  nm,  $\lambda_{em} = 517$  nm). A buffer containing 50 mM Tris-HCl, pH 7.4, 50 mM MgCl<sub>2</sub>, and 0.1% Tween-20 was used. Samples were incubated in 5°C water bath for 1 hr. Samples were then taken out of the bath and analyzed in the Perkin-Elmer LS-5S Luminescence Spectrophotometer at room temperature. Fluorescent values at 517 nm were recorded. Three independent trials for each sample were averaged and plotted in Excel with error bars indicating one standard deviation. The LOD was determined by calculating the signal of the control (0 nM of analyte) + 3\*(standard deviation of the control).

2. *Table S1*. Oligonucleotide sequences used in the study.

| Name                        | Sequence                                                                             | Purification |
|-----------------------------|--------------------------------------------------------------------------------------|--------------|
| <b>inhT (DNA)</b>           | 5'—GCG GCA TGG GTA TGG GCC ACT GAC A <u>T</u> A ACA<br>CAA GGA C                     | SD           |
| <b>inhC (DNA)</b>           | 5'—GCG GCA TGG GTA TGG GCC ACT GAC A <u>C</u> A ACA<br>CAA GGA C                     | SD           |
| <b>inhT (RNA)</b>           | 5'—GCG GCA UGG GUA UGG GCC ACU GAC A <u>U</u> A ACA<br>CAA GGA C                     | SD           |
| <b>inhC (RNA)</b>           | 5'—GCG GCA UGG GUA UGG GCC ACU GAC A <u>C</u> A ACA<br>CAA GGA C                     | SD           |
| <b>inh_ins</b>              | 5'—GCG GCA TGG GTA TGG GCC ACT GAC A <u>CCA</u> ACA<br>CAA GGA C                     | SD           |
| <b>inh_del</b>              | 5'—GCG GCA TGG GTA TGG GCC ACT GAC A <u>_A</u> ACA<br>CAA GGA C                      | SD           |
| <b>inhT_Q</b>               | 5'—GCG GCA TGG GTA TGG GCC ACT GAC A <u>T</u> A ACA<br>CAA GGA C/BHQ1/               | HPLC         |
| <b>inhC_Q</b>               | 5'—GCG GCA TGG GTA TGG GCC <u>ACT GAC A</u> <u>C</u> A ACA<br>CAA <u>GGAC</u> /BHQ1/ | HPLC         |
| <b>Linear Probe</b>         | /FAM/5'—TCT TGT GTT <u>G</u> TG TCA GTG A                                            | HPLC         |
| <b>MB Probe</b>             | /FAM/5'—CGCTC TTG TGT <u>T</u> G TGC AGT GAGCG/BHQ1/                                 | HPLC         |
| <b>UMB1</b>                 | /FAM/5'— <u>CGCG</u> TTAA CATA CAAT AGAT <u>CGCG</u> /BHQ1/                          | SD           |
| <b>R<sub>12</sub></b>       | 5'—CTATTG AGTGG CCCATA CGCGATC                                                       | SD           |
| <b>P<sub>12</sub></b>       | 5'—AACGCG TTGTGT <u>T</u> G TGTC TATGTT                                              | SD           |
| <b>R<sub>11</sub></b>       | 5'—TATTG AGTGG CCCATA GCGATC                                                         | SD           |
| <b>P<sub>11</sub></b>       | 5'—TAACGC TGTGTT GT <u>G</u> TGTC TATGT                                              | SD           |
| <b>R<sub>10</sub></b>       | 5'—TATTG AGTGG CCCAT CGATC                                                           | SD           |
| <b>P<sub>10</sub></b>       | 5'—TAACG GTGTT GT <u>G</u> TGTC TATGT                                                | SD           |
| <b>R<sub>9</sub></b>        | 5'—TATTG AGTGG CCCA GATC                                                             | SD           |
| <b>P<sub>9</sub></b>        | 5'—TAAC TGTT GT <u>G</u> TGTC TATGT                                                  | SD           |
| <b>P<sub>9_A</sub></b>      | 5'—TAAC TGTT GT <u>A</u> TC TATGT                                                    | SD           |
| <b>R<sub>8</sub></b>        | 5'—ATTG AGTG GCCC ATCT                                                               | SD           |
| <b>P<sub>8</sub></b>        | 5'—TTAA GTTG <u>T</u> GTC TATG                                                       | SD           |
| <b>A<sub>10</sub></b>       | 5'—CGATC TATTG/TEG/AGTGG CCCAT                                                       | SD           |
| <b>B<sub>11</sub></b>       | 5'—TG TGTT GTGTC/TEG/TATGT TAAC GC                                                   | SD           |
| <b>B<sub>10</sub></b>       | 5'—G TGTT GTGTC/TEG/TATGT TAAC G                                                     | SD           |
| <b>B<sub>9</sub></b>        | 5'—TGTT GTGTC/TEG/TATGT TAAC                                                         | SD           |
| <b>B<sub>8</sub></b>        | 5'—GTT GTGTC/TEG/TATGT TAA                                                           | SD           |
| <b>R<sub>12h</sub></b>      | 5'—CTATTG AGTGGC <u>T</u> CATAC CGCGAT                                               | SD           |
| <b>R<sub>11h</sub></b>      | 5'—TATTG AGTGG <u>T</u> CCATA GCGATC                                                 | SD           |
| <b>R<sub>10h</sub></b>      | 5'—TATTG AGTGG <u>T</u> CCAT CGATC                                                   | SD           |
| <b>R<sub>10_o</sub>-TEG</b> | 5'—TATTG AGTGG CCCAT/TEG/CGATC                                                       | SD           |
| <b>P<sub>9_i</sub>-TEG</b>  | 5'—TAAC TGTT GT <u>G</u> TGTC/TEG/TATGT                                              | SD           |
| <b>P<sub>9_o</sub>-TEG</b>  | 5'—TAAC/TEG/TGTT GT <u>G</u> TGTC TATGT                                              | SD           |
| <b>miDNA99a</b>             | 5'—AA CCCGT AGATC CGAT <u>C</u> TTGT G                                               | SD           |

|                  |                                              |    |
|------------------|----------------------------------------------|----|
| <b>miDNA100</b>  | 5'—AA CCCGT AGATC CGACC TTGT G               | SD |
| <b>miRNA99a</b>  | 5'—AA CCCGU AGAUC CGAUC UUGU G               | SD |
| <b>miRNA100</b>  | 5'—AA CCCGU AGAUC CGACC UUGU G               | SD |
| <b>R12_mi</b>    | 5'— CTTATTG GATCTA CGGGTT CGCGATC            | SD |
| <b>R11_mi</b>    | 5'—CTTATTG GATCTA CGGGT GCGATC               | SD |
| <b>R10_mi</b>    | 5'—TTATTG GATCT ACGGG CGATC                  | SD |
| <b>P9_mi_99a</b> | 5'—TAAC ACAA GATCG TATGT                     | SD |
| <b>P9_mi_100</b> | 5'—TAAC ACAA GTTCG TATGT                     | SD |
| <b>Xf_inh</b>    | 5'—GAT CTA TTG/TEG/CAG TGG CCC ATA CCC ATG C | SD |
| <b>Xm_6_inh</b>  | 5' —TT G TGT/TEG/TAT GTT AAC                 | SD |

---

<sup>a</sup>*teg*, triethylene glycol linkers; SD, standard desalting; BHQ1, black hole quencher 1; FAM, fluorescein label; SNS sites are underlined; self-complementary regions of MB probes are in italic, SNV and SNV-complementary nucleotides are in red.

### 3. Secondary structure of the **inhC** analyte

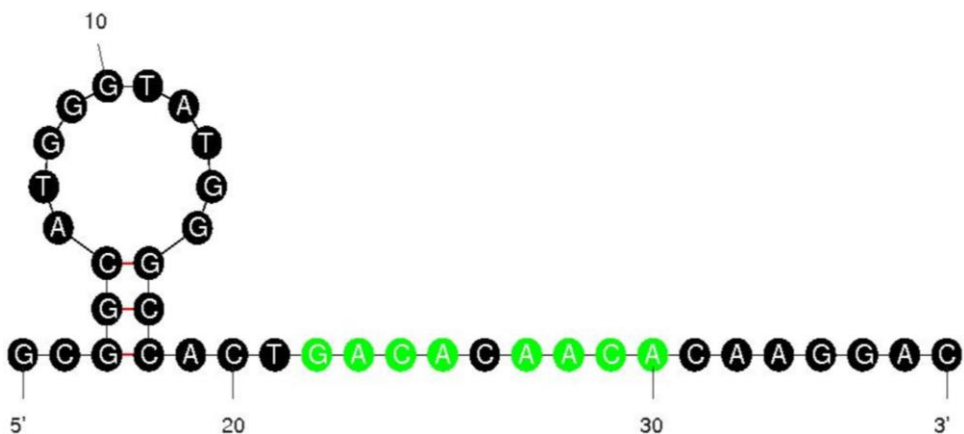

**Figure S1. Secondary structure of the **inhC** analyte.** Lowest energy folding of the **inhC** analyte in mfold<sup>5</sup> shows a nearly linear structure. The green nucleotides indicate the region where **P<sub>9</sub>** binds. The black nucleotide in the middle of the green region indicates the variable base (mismatch site); the **InhT** version of the analyte has a thymine in this position. The **InhC** and **InhT** analytes both have a  $\Delta G = -1.84$  kcal/mol at 37°C when folded under the automatic mfold parameters.

4. Melting curves for  $R_{10}/P_Y$  Owl Sensors in complex with **InhC** and **InhT** analytes

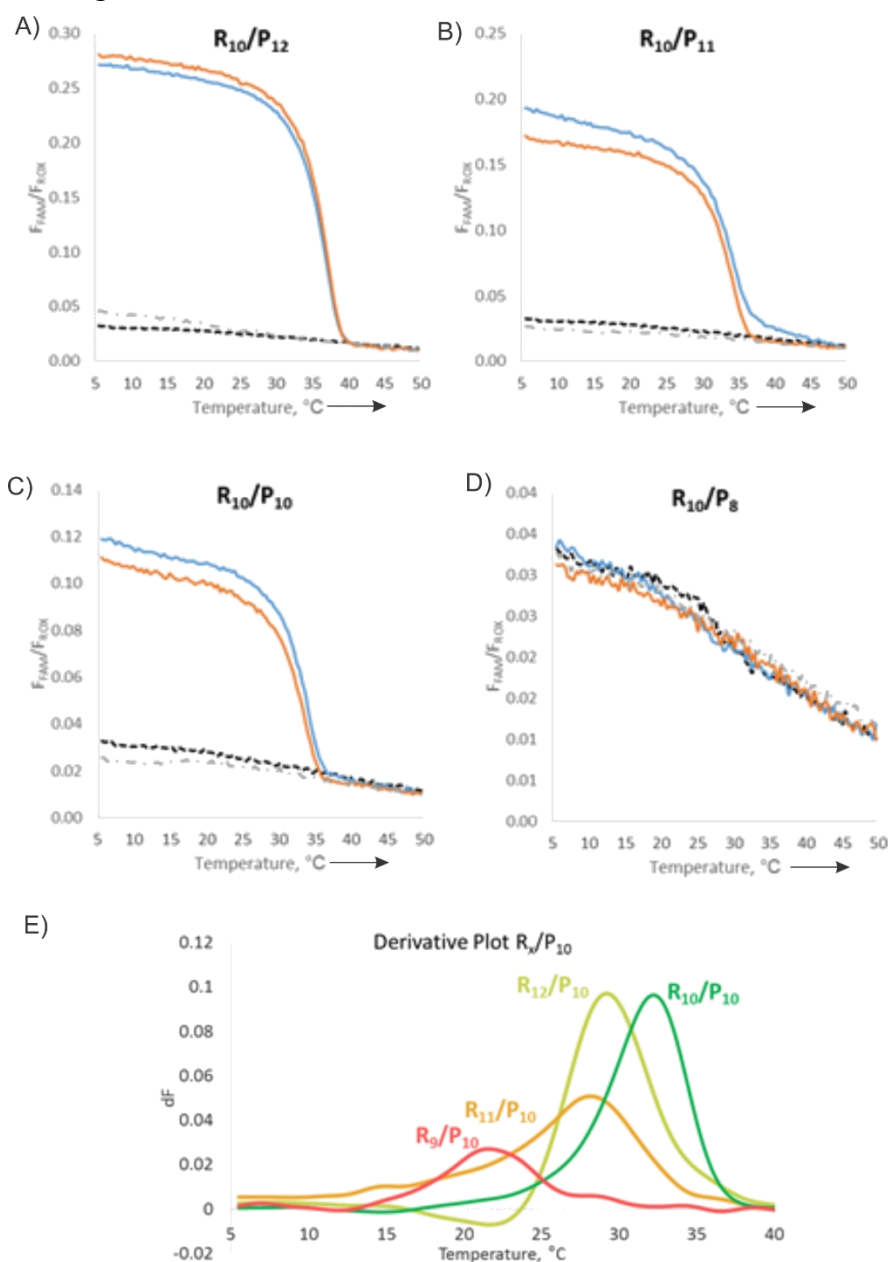

**Figure S2. Performance of Owl Sensor with different combinations of P and R strands.** Melting curves with  $R_{10}/P_X$  Owl Sensors and the derivative of the fluorescence of the matched analyte (panel E) shows the  $T_m$  at the peak of the curve.  $R_{10}/P_{12}$ ,  $R_{10}/P_{11}$  and  $R_{10}/P_{10}$  sensors are so stable that they do not differentiate well between matched **InhC** and mismatched **InhT** analytes (panels A, B and C).  $R_{10}/P_8$  sensor (panel D) is unstable since it does not produce fluorescence above the background in the presence of matched analyte. The melt curve for  $R_{10}/P_{10}$  Owl Sensor shows high signal for both the matched (blue) and mismatched (orange) analytes, showing poor differentiation of a mismatch. This shows that  $R_{10}/P_{10}$  is the most stable structure of the  $R_x/P_{10}$  combinations tested. Unlike conventional probes, with our sensor design, additional nucleotides do not add to increased complex stability.

5. Melt curves complexes of  $R_X/P_9$  ( $X=8,9,11,12$ ) with **InhC** and **InhT** analytes

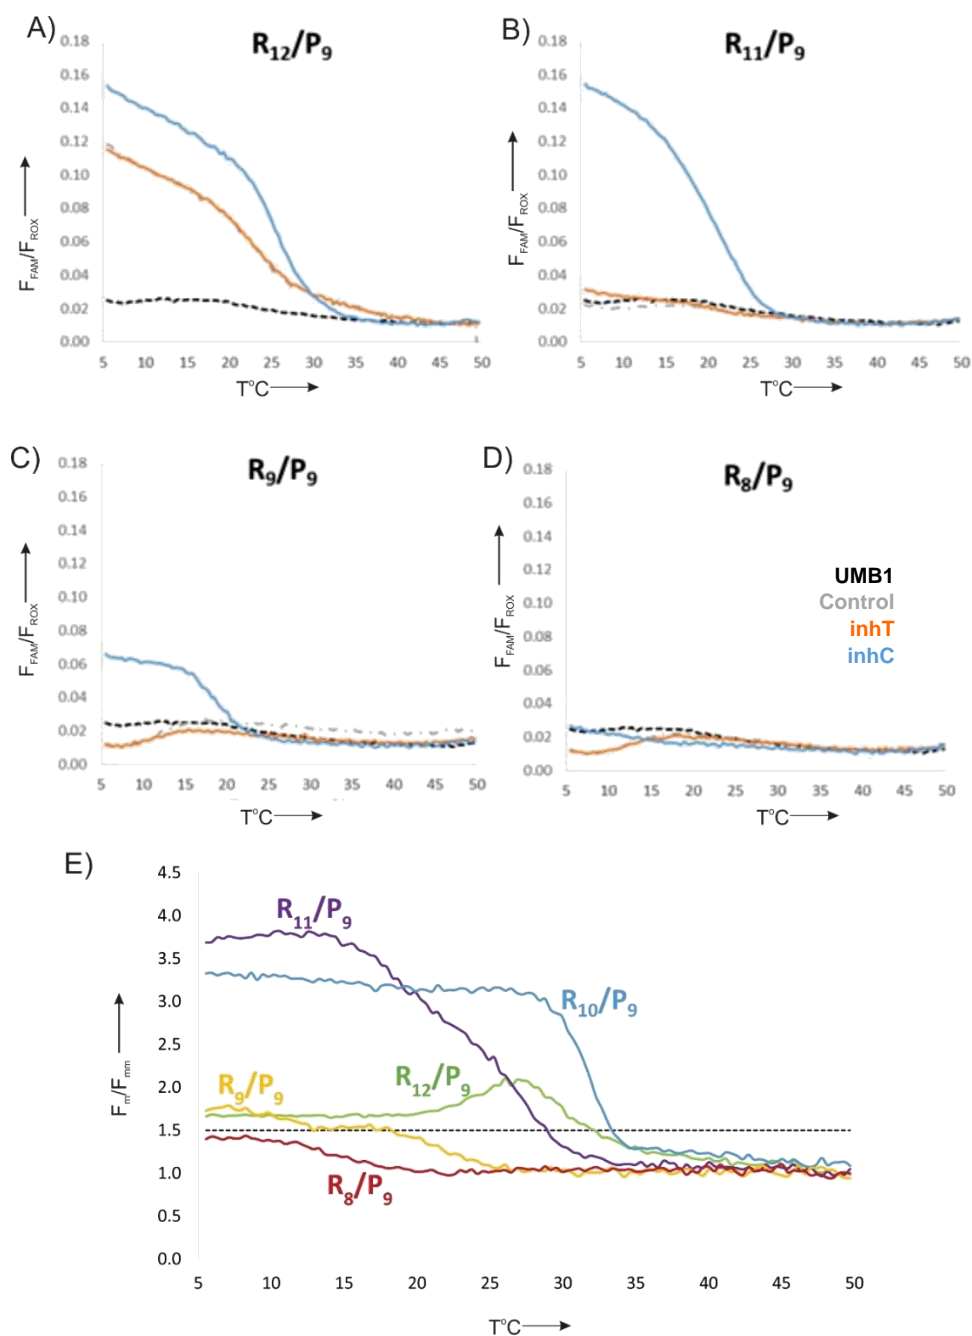

**Figure S3.  $R_{10}/P_9$  produces the highest signal to background ratio and greatest differentiation of the mismatched InhT analyte.** E) By dividing the fluorescence of the matched analyte by the fluorescence of the mismatched analyte ( $F_M/F_{mm}$ ) from Panels A-D, the differentiating power can be quantified. The green, purple, blue, yellow, and maroon lines represent  $P_9$  in combination with  $R_{12}$ ,  $R_{11}$ ,  $R_{10}$ ,  $R_9$ , and  $R_8$ , respectively. Here we see that  $R_{10}/P_9$  shows the largest temperature range for differentiation, spanning 5-32°C. The horizontal line labeled  $\Delta T_{1.5}$  indicates the cutoff line being used to determine differentiability.



## 6. Melting curves for MB and leaner probe - **Inh** analyte complexes

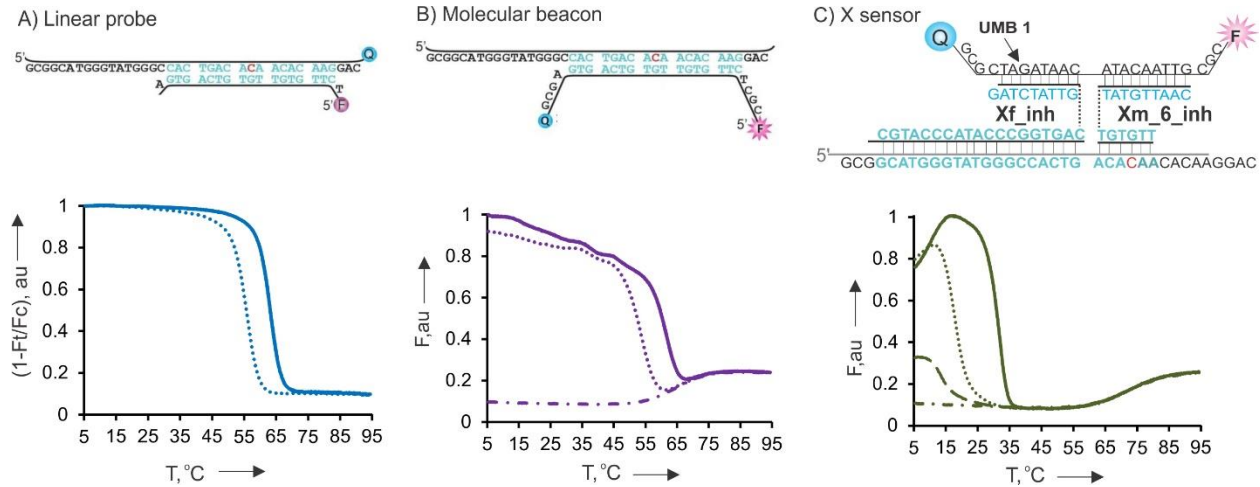

**Figure S4. Fluorescence of the MB the Linear probe and X sensor in temperature interval 5-95°C.**  
 A) Linear probe. Upper panel: Linear probe hybridized to the matched analyte. The analyte was labeled by a quencher dye (Q), while the probe was conjugated with a fluorophore (F) to enable fluorescent detection of complex formation. Bottom panel: Reverse fluorescence ( $1-F$ ) of the probe in the presence of matched **Inh\_C\_Q** (solid lines) and mismatched (dotted lines) **Inh\_T\_Q** analytes at different temperatures. The reverse fluorescence is presented to simplify comparison the data with panels B and C since linear probe, as designed, increased fluorescence upon melting, not decreasing as MB probe and X sensor. B) Molecular beacon probe. Upper panel: MB probe hybridizes to complementary target and produces fluorescent signal. The SNP position is shown in red, and the mutation is C  $\rightarrow$  T. Bottom panel: Melting temperature curves for specific MB probe. C) X sensor. Upper panel: Fluorescent crossover (X) complex formed by strands **Xf\_inh** and **Xm\_6\_inh** when binding to analyte **Inh\_C** and MB probe. MB-binding arms of strands f and m are in cyan. Bottom panel: Melting temperature curves for X sensors with 6-nucleotides long analyte binding (**X\_m-6\_inh** in Table 2).

## 7. Differentiation of SNV by the $R_{10}/P_9$ Owl Sensor

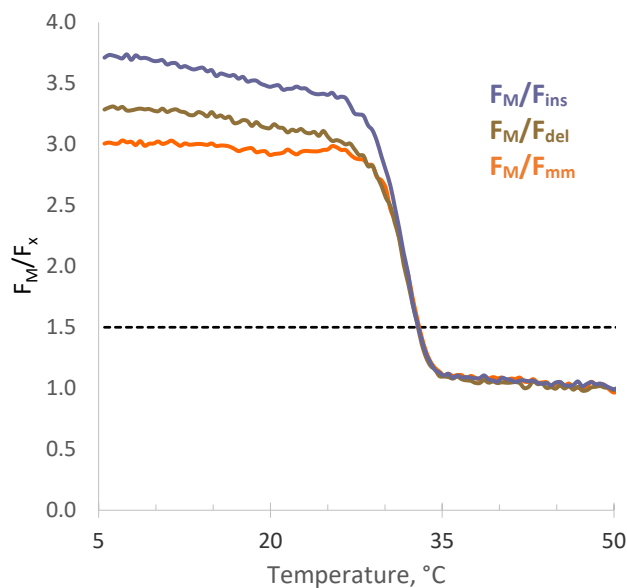

**Figure S5. The  $R_{10}/P_9$  Owl Sensor shows excellent selectivity with InhC and InhT analytes.** Differentiation ability for  $R_{10}/P_9$  with DNA analytes shows the Owl sensor can be assessed by graphing fluorescence of the matched analyte ( $F_M$ ) divided by  $F_x$ , where  $F_x$  is the fluorescence of the insertion, deletion or mismatched analyte as indicated by  $F_i$ ,  $F_d$ , and  $F_{mm}$ . Results show that excellent differentiation is achieved in the range 5-32.4 $^{\circ}\text{C}$ . The black dashed line is  $\Delta T_{1.5}$ , the standard for differentiation, set at  $F_M/F_x$  being greater than or equal to 1.5.

## 8. Selectivity of $R_{10}/P_{9\_A}$ specific to **InhT** analyte

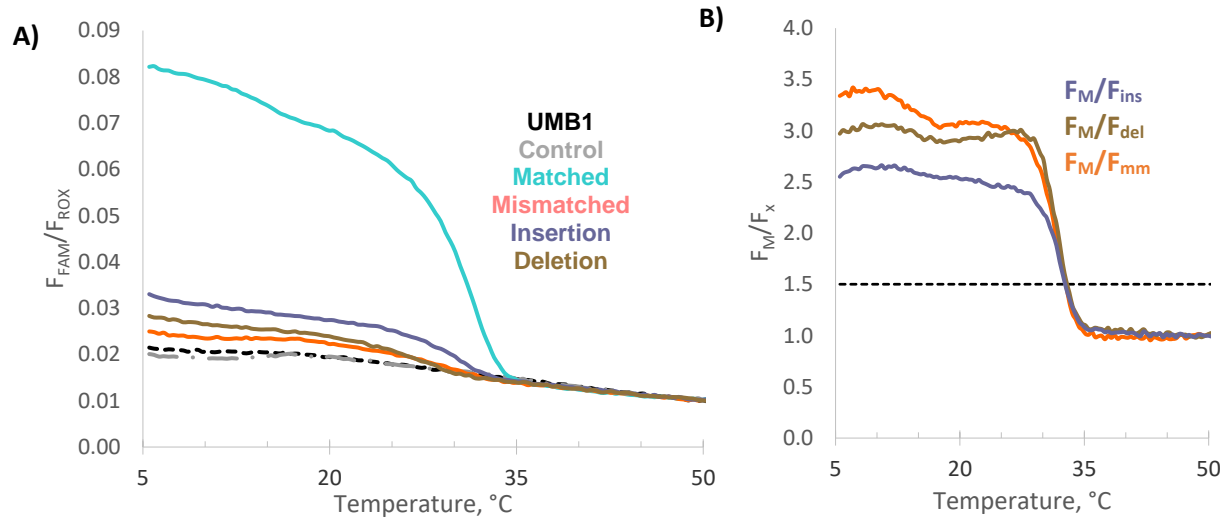

**Figure S6. Owl Sensor specific to InhT DNA shows excellent performance.** A) Melt Curve for  $R_{10}/P_{9\_A}$  sensor the **InhT**-specific Owl Sensor, with DNA analytes shows high signal for the matched analyte (teal line) with minimal signal for insertion (purple line), deletion (brown line), and mismatched (orange) analytes. The signal from **UMB1** alone is represented by the black dashed line, and the signal from the control (**UMB1** with  $R_{10}$  and  $P_{9\_A}$ ) is represented by the grey dotted dashed line. B) Differentiation ability for  $R_{10}/P_{9\_A}$  sensor with DNA analytes shows the Owl Sensor can be assessed by graphing  $F_M/F_x$ . Results show that differentiation is achieved up to 32.6°C for all SNVs tested.

## 9. Limit of Detection for the $R_{10}/P_9$ Owl Sensor

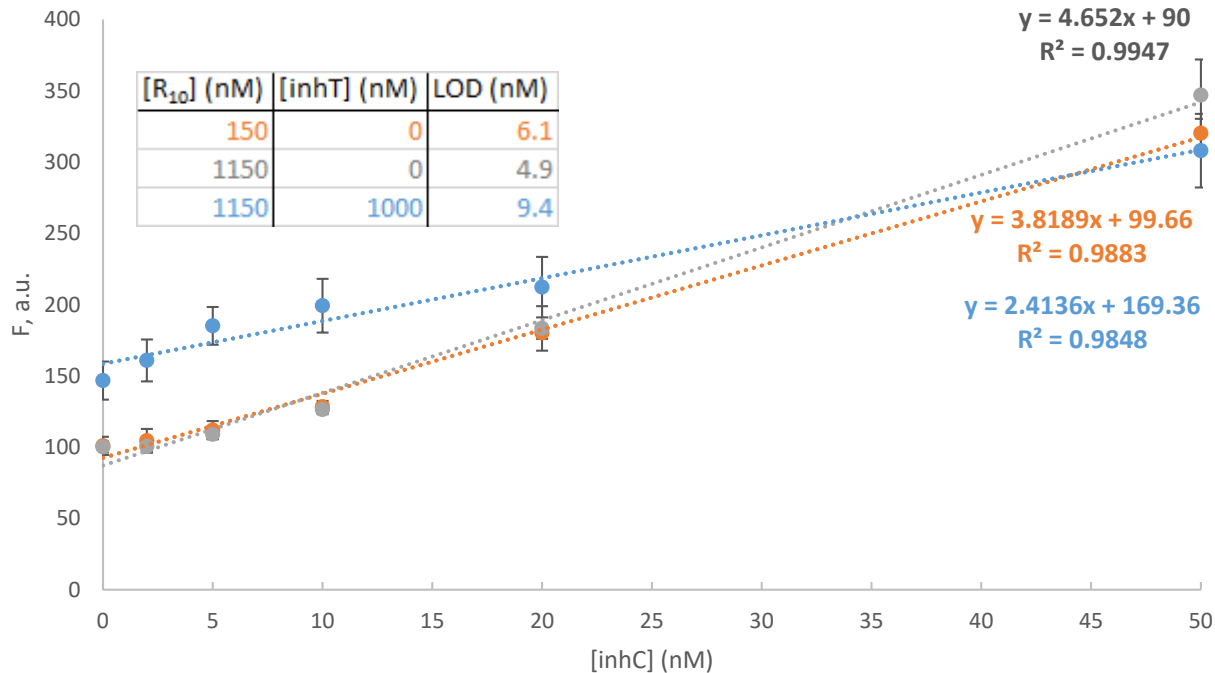

**Figure S7. Limit of detection (LOD) for the  $R_{10}/P_9$  Owl Sensor.** The inset shows the concentration of  $R_{10}$ ,  $InhC$  (matched), and  $InhT$  (mismatched) and the LOD for each of the three samples. The orange line represents the LOD for the same concentrations of oligonucleotides as the melt curves. The blue line shows the LOD for the Owl Sensor when a large excess of  $InhT$  (mismatched) analyte is present. This shows that the  $P_9$  strand did not hybridize large amounts of excess nonspecific analyte, and shows that the correct analyte can be detected even with mismatched analyte at over 100 times excess concentrations. Since  $R_{10}$  binds to an unchanged region of the *inhA* analyte (its analyte binding domain is fully complementary to  $InhC$  and  $InhT$ ), high concentrations of  $R_{10}$  were used (1.15  $\mu$ M) so that enough  $R_{10}$  was available to bind both  $InhC$  and the large excess of  $InhT$ . For comparison, LOD with 1.15  $\mu$ M of  $R_{10}$  was also found to be 4.9 nM (grey line).

10. Differentiation of the Owl Sensor with outside TEG Linkers.

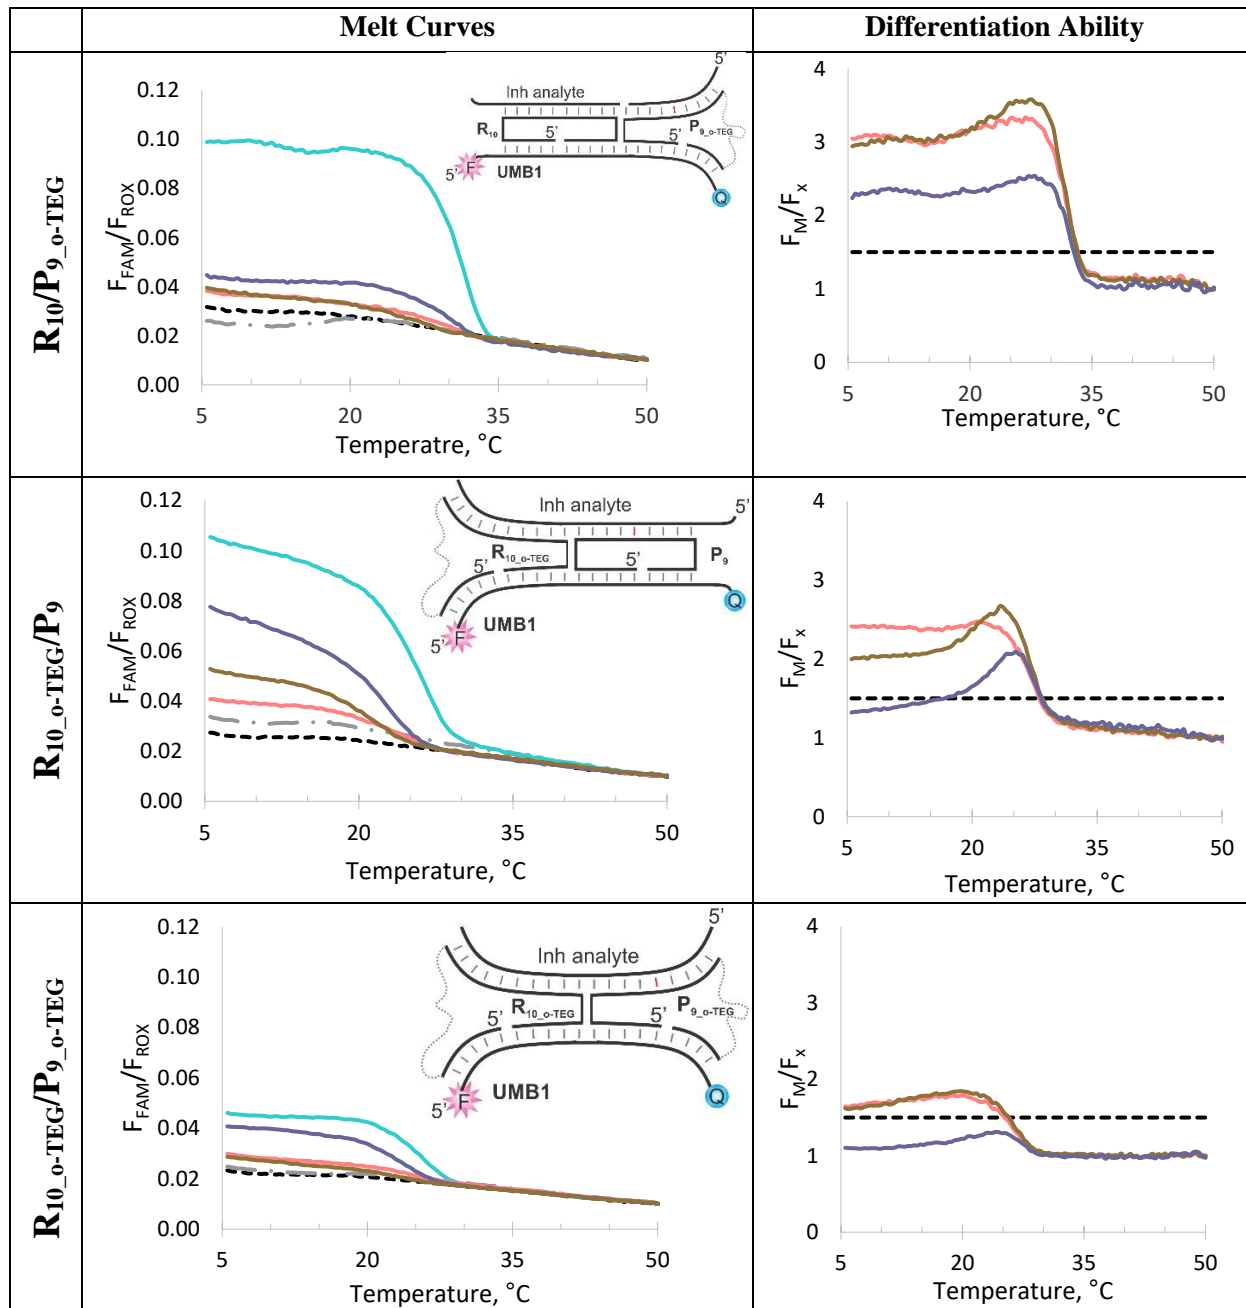

**Figure S8. Differentiation of the Owl Sensor with TEGs on the outside junctions.** Melting curves and differentiation are shown for the Owl Sensor with outside TEG linkers in the **P**, **R**, and both adapter strands (o-TEG). For melting curves, the fluorescence of the matched, insertion, deletion, and mismatched analyte is shown in cyan, purple, brown, and peach, respectively. For differentiation graphs, the fluorescence of the matched was divided by that of the insertion, mismatch, or deletion analyte and is shown in purple, orange, or brown, respectively. Drawings of the Owl Sensor with TEG linkers are shown as insets to the melt curves. The melt curves for the  $R_{10-o-TEG}/P_{9-o-TEG}$  show overall very low fluorescence for the complex (SI

Table 1). This is likely due to low complex formation and because flexibility on the outside of the sensor allows for the possibility of the ends of the complex bending around. Results show that adding flexibility to the outside junction of **P<sub>9</sub>** (**P<sub>9</sub>-o-TEG**) did not significantly affect the differentiation ability or complex stability and even slightly increased the fluorescent value at 5°C for the matched analyte when compared to that of **R<sub>10</sub>/P<sub>9</sub>** or **R<sub>10</sub>/P<sub>9</sub>-A** sensors (the **P<sub>9</sub>-A** was specific to the mutant **inhT** analyte). A possible reasoning for this is that the flexibility on the outside of the **P<sub>9</sub>** strand allows for a reduction in the strain of the complex caused by non-ideal exit trajectories into the flexible TEG linker.

Adding TEG linkers increased the entropy of the adapter strands, especially when unbound, and according to the equation  $\Delta G = \Delta H - T\Delta S$ , increasing the entropy results in a more negative  $\Delta G$ . If the TEG linker is on the outside of the Owl Sensor complex, as is the case for strands with outside and double TEGs, not only is the entropy of the reactants increased due to having more flexible free DNA strands, but the entropy of the products increases, as the formed Owl Sensor complex is able to more easily bend out of plane (See drawings SI Tables 2 and 4). While the ends of the helices of the regular Owl Sensor are tethered with little flexibility or freedom for movement, the outside and double TEG linkers allow for the helices to adopt non-parallel helices due to the increased flexibility, which is associated with higher entropy of the complex.

Contrastingly, having only one inside TEG linker does not significantly increase the flexibility of the system. Therefore, adding flexibility into only one inside junction of the Owl Sensor will increase the stability of the dissociated state, as the entropy of the free strand will increase without adding much entropy into the formed complex, resulting in low complex formation and a reduction in the stability of the associated state, as expressed by a low  $T_m$ .

While it is unclear how to explain the mechanism of complex destabilization and loss of differentiation behind each combination of the **R<sub>10</sub>/P<sub>9</sub>** strands, it can be generally stated for the Owl Sensor that a rigid structure is optimum for a large temperature range for differentiation of SNVs.

### 11. Differentiation of the Owl Sensor with inside TEG Linkers

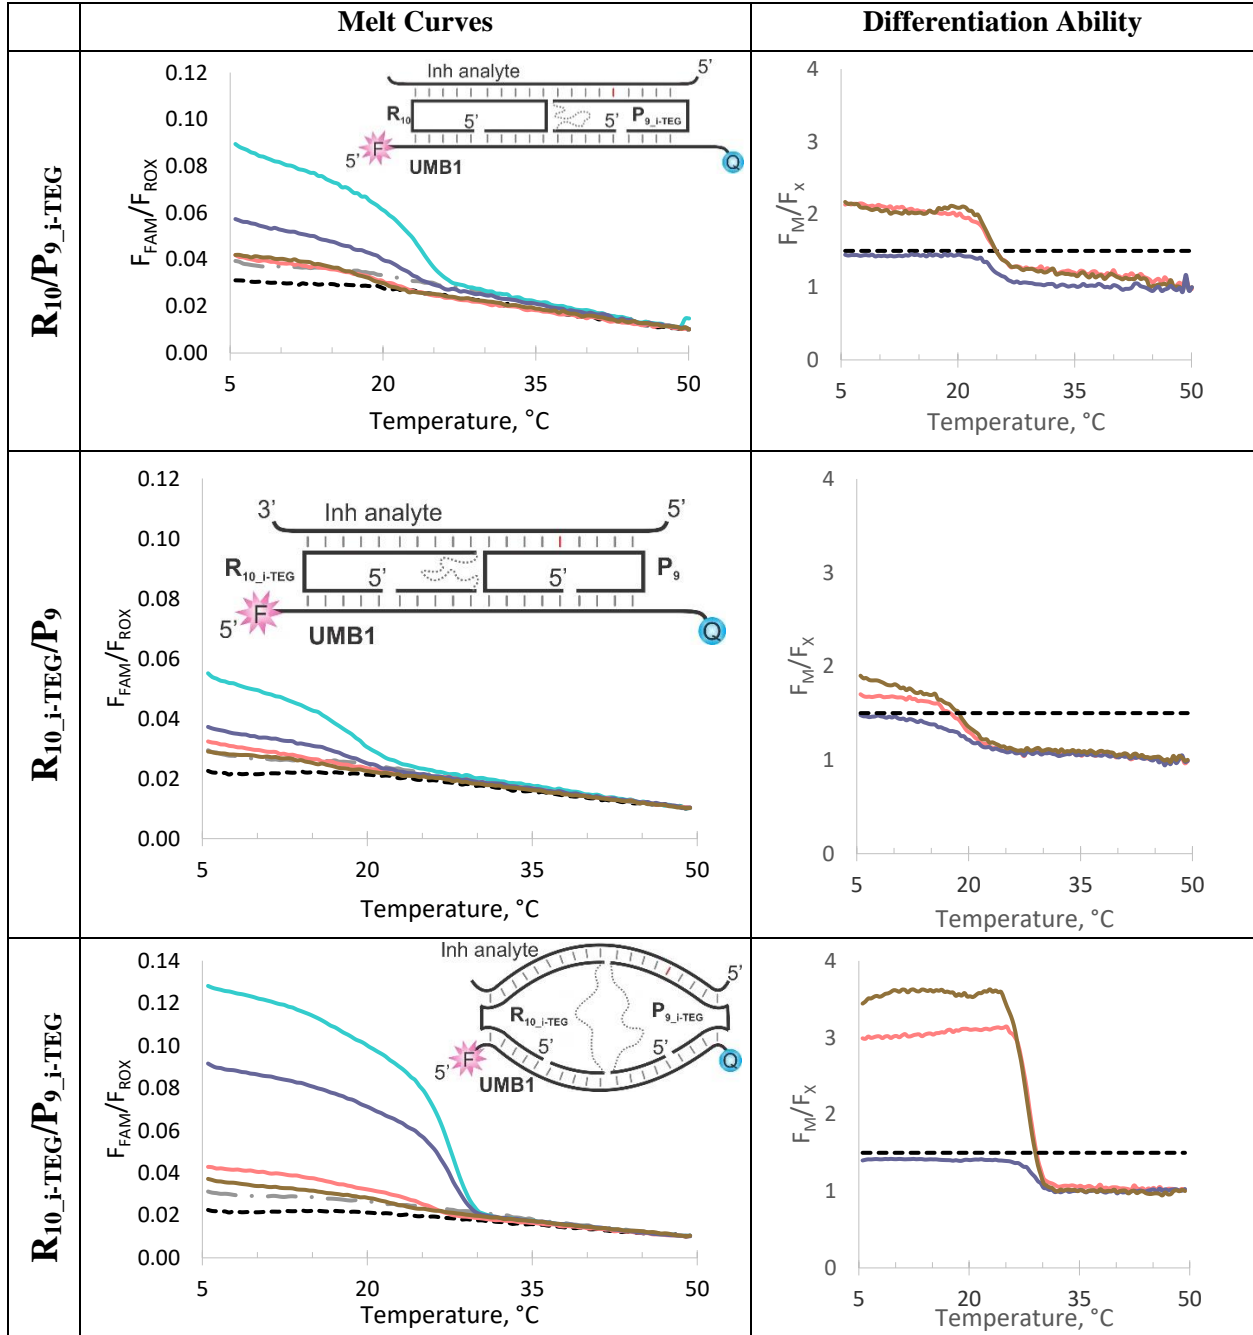

**Figure S9. Differentiation of the Owl Sensor with TEGs on the inside junctions.** Melt curves and differentiation is shown for the Owl Sensor with inside TEG linkers in the **P**, **R**, and both adapter strands (*i*-TEG). For melt curves, the fluorescence of the matched, insertion, deletion and mismatched analyte is shown in cyan, purple, brown, and peach, respectively. For differentiation graphs, the fluorescence of the matched was divided by that of the insertion, mismatch, or deletion analyte and is shown in purple, orange, or brown, respectively. Drawings of the Owl Sensor with TEGs are shown as insets to the melt curves.

## 12. Differentiation of the Owl Sensor with inside and outside TEG Linkers

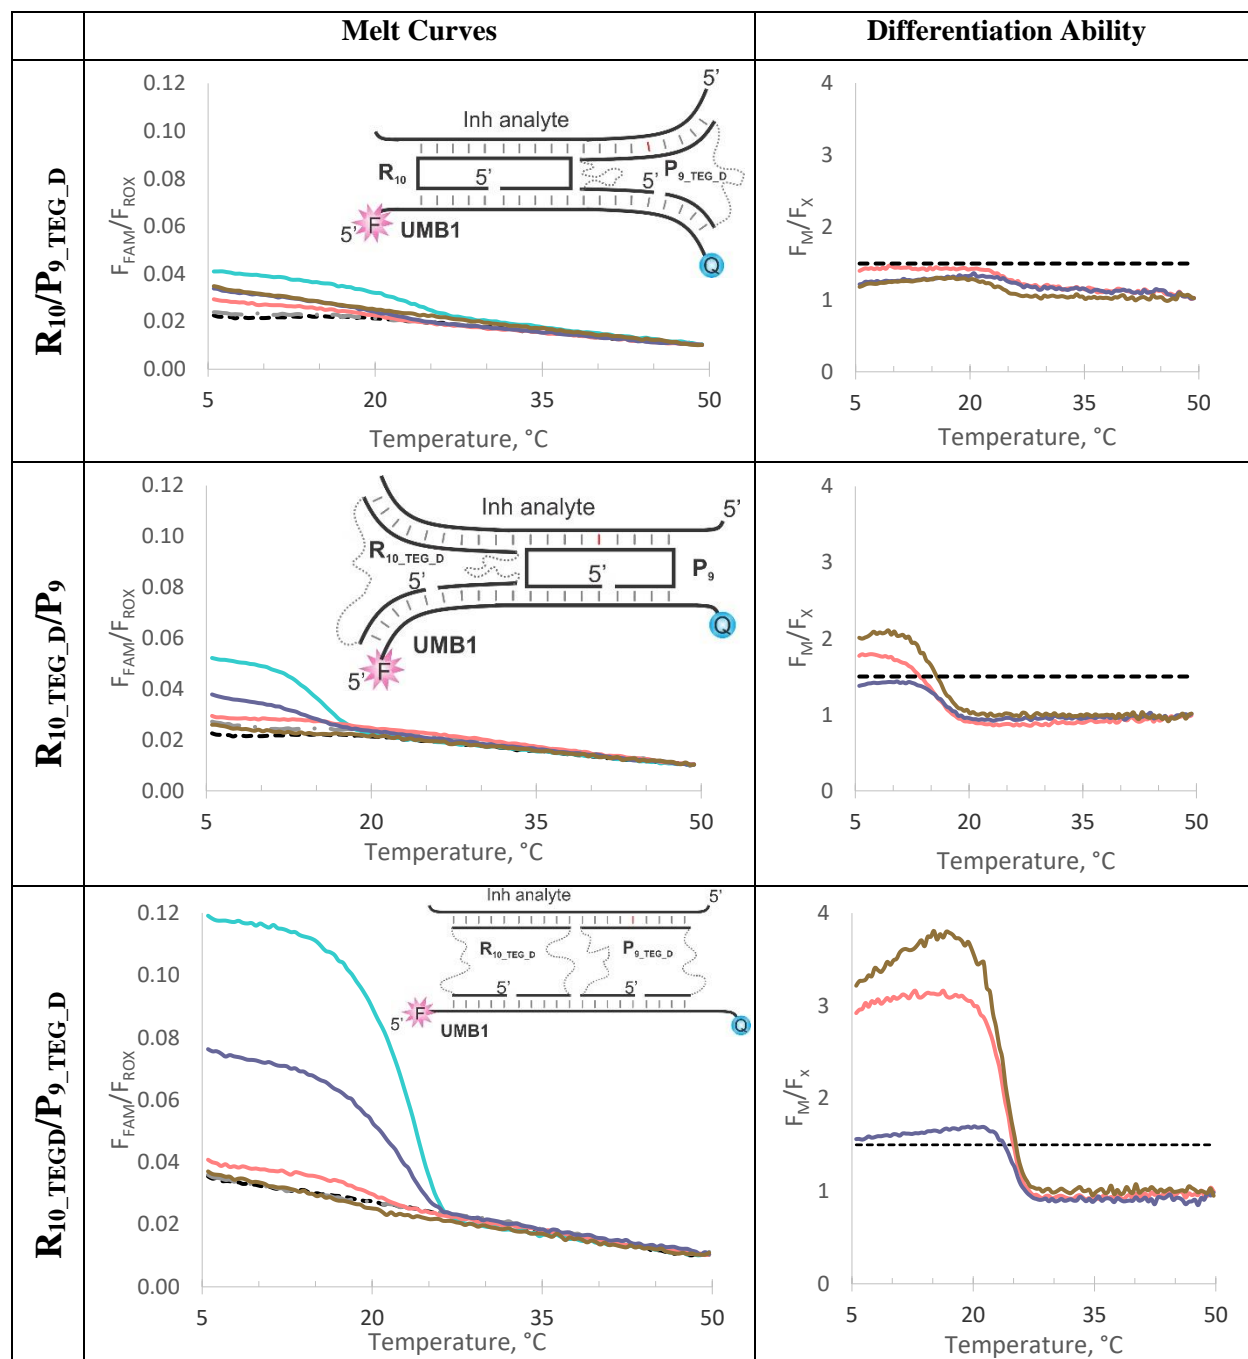

**Figure S10. Differentiation of the Owl Sensor with TEG linkers on the both junctions.** Melt curves and differentiation are shown for the Owl Sensor with TEG linkers on the inside and outside of **P**, **R**, and both adapter strands (TEGD). For melt curves, the fluorescence of the matched, insertion, deletion, and mismatched analyte is shown in cyan, purple, brown, and peach, respectively. For differentiation graphs, the fluorescence of the matched was divided by that of the insertion, mismatch, or deletion analyte and is shown in purple, orange, or brown, respectively. Drawings of the Owl Sensor with TEGs are shown as insets to the melt curves.



**13. Table S2.** Temperature differentiation ranges for Owl Sensor and other probes

| Probe            | T <sub>low</sub> | T <sub>high</sub> | $\Delta T_{1.5}$ |
|------------------|------------------|-------------------|------------------|
| Linear Probe     | 46.8             | 62.4              | 15.6             |
| Molecular Beacon | 51.1             | 65.9              | 14.8             |
| X sensor         | 16.2             | 35.0              | 18.8             |
| Owl Sensor       | 5.0              | 32.4              | 27.4             |

The differentiation by each of the sensors. T<sub>low</sub> is the lowest temperature where differentiation can be achieved. T<sub>high</sub> is the highest temperature in which differentiation is achieved. The  $\Delta T_{1.5}$  is calculated by T<sub>high</sub>-T<sub>low</sub>.

**14. Table S3.** Differentiation Ranges for Owl Sensor R<sub>X</sub>/P<sub>9</sub>.

| <b>x</b>  | <b><math>\Delta T_{1.5}</math></b> | <b>Temperature Range (°C)</b> |
|-----------|------------------------------------|-------------------------------|
| <b>12</b> | 26.9                               | 5.0-31.9                      |
| <b>11</b> | 23.8                               | 5.0-28.8                      |
| <b>10</b> | 27.0                               | 5.0-32.4                      |
| <b>9</b>  | 12.9                               | 5.0-17.9                      |
| <b>8</b>  | 0.0                                | --                            |

The largest temperature range for analyte differentiation is with the R<sub>10</sub>/P<sub>9</sub> Owl Sensor with DNA analytes.

## 15. Diffrentiation of **Inh\_C** and **Inh\_T** anlytes by X sensor

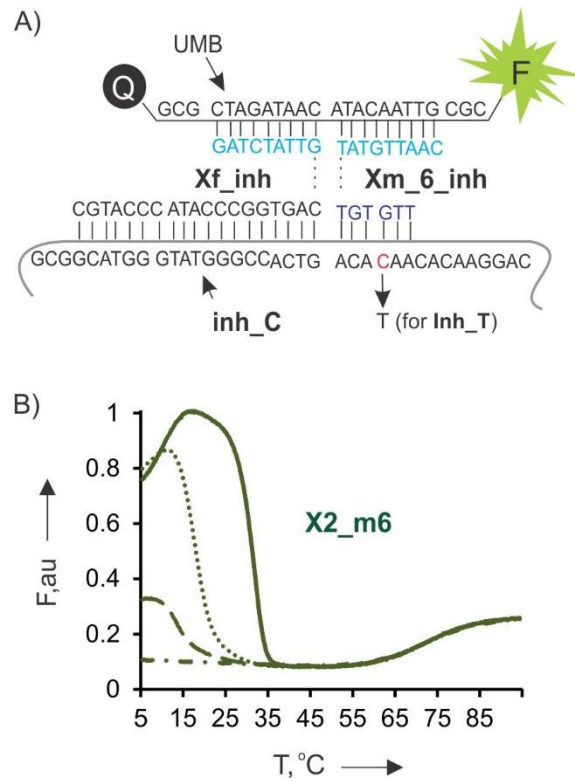

**Figure S11. Recognition of InhC and Inh T analytes by complementary X sensor.** A) Hybridization of X sensor to **InhC**. A 'c' at SNS position is red. B) Melting curves of corresponding complexes InhC ( solid line) and Inh\_T (dotted line) complexes with X sensor. Dashed line – X sensor without analyte; dashed-dotted line: **UMB1** only controls. The reaction mixtures contain 50 mM Tris-HCl (pH = 7.4), 100 mM MgCl<sub>2</sub>, 0.1% Tween 20, 50 nM **UMB1**, 200 nM **Xf\_inh**, and 120 nM **Xm\_6\_inh**.

## 16. Owl sensors performance with RNA Inh-related analytes

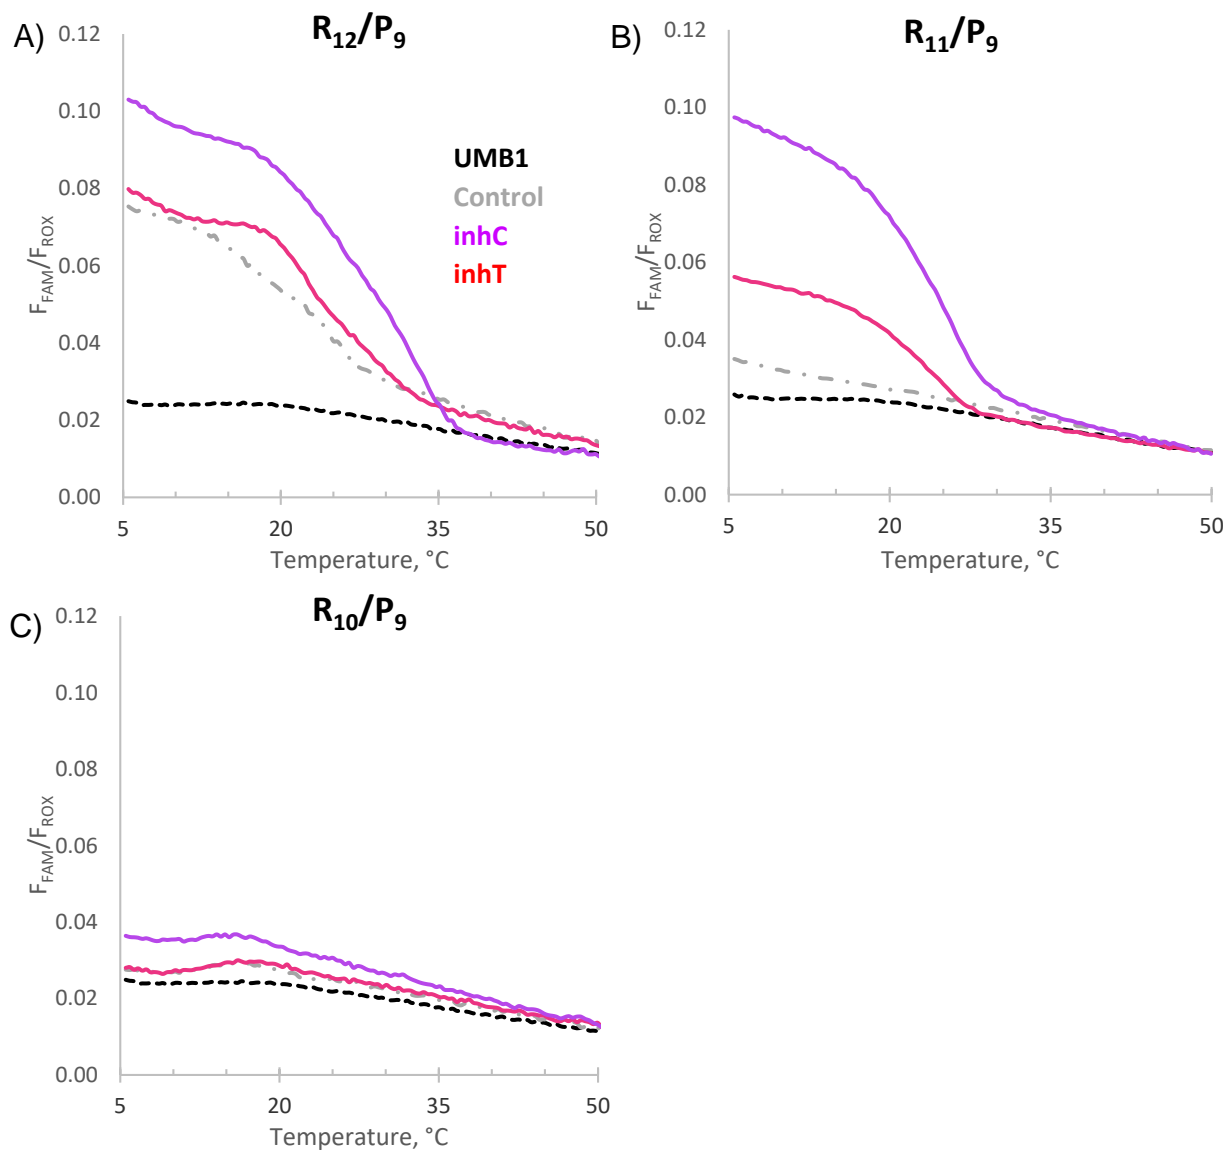

**Figure S12. R<sub>11</sub>/P<sub>9</sub> is the best Owl Sensor for differentiating SNPs in RNA analytes.** Assays done at 50 mM MgCl<sub>2</sub>. A) Melt Curve for R<sub>12</sub>/P<sub>9</sub> with RNA analytes shows little differentiation. B) Melt Curve for R<sub>11</sub>/P<sub>9</sub> with RNA analytes shows the best differentiation for matched and mismatched analytes. C) Melt Curve for R<sub>10</sub>/P<sub>9</sub> with RNA analytes shows minimal complex formation.

17. Owl Sensor optimized performance with RNA Inh-related analytes.

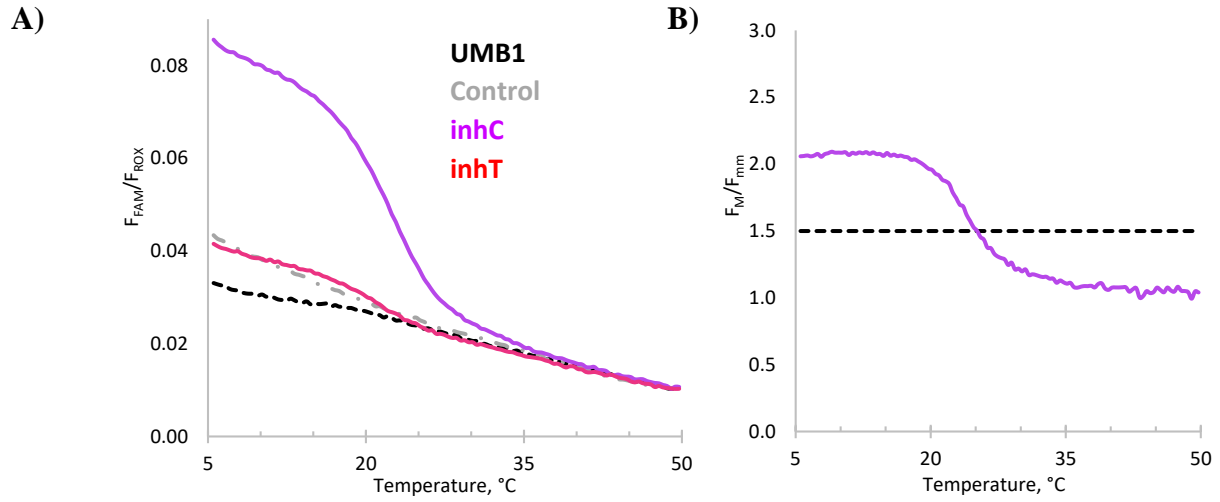

**Figure S13. The Owl Sensor is able to differentiate mismatches in RNA analytes.** A) Melt Curve for  $R_{11}/P_9$  sensor with *inhA* RNA analytes. B) Differentiation ability for  $R_{11}/P_9$  sensor with RNA analytes extends from 5-25.1°C using 10 mM  $MgCl_2$ .

In order to increase differentiation between matched and mismatched analytes,  $MgCl_2$  concentrations were optimized to 10 mM.

18. Structures of Owl Sensors in complex with miDNA99a analytes

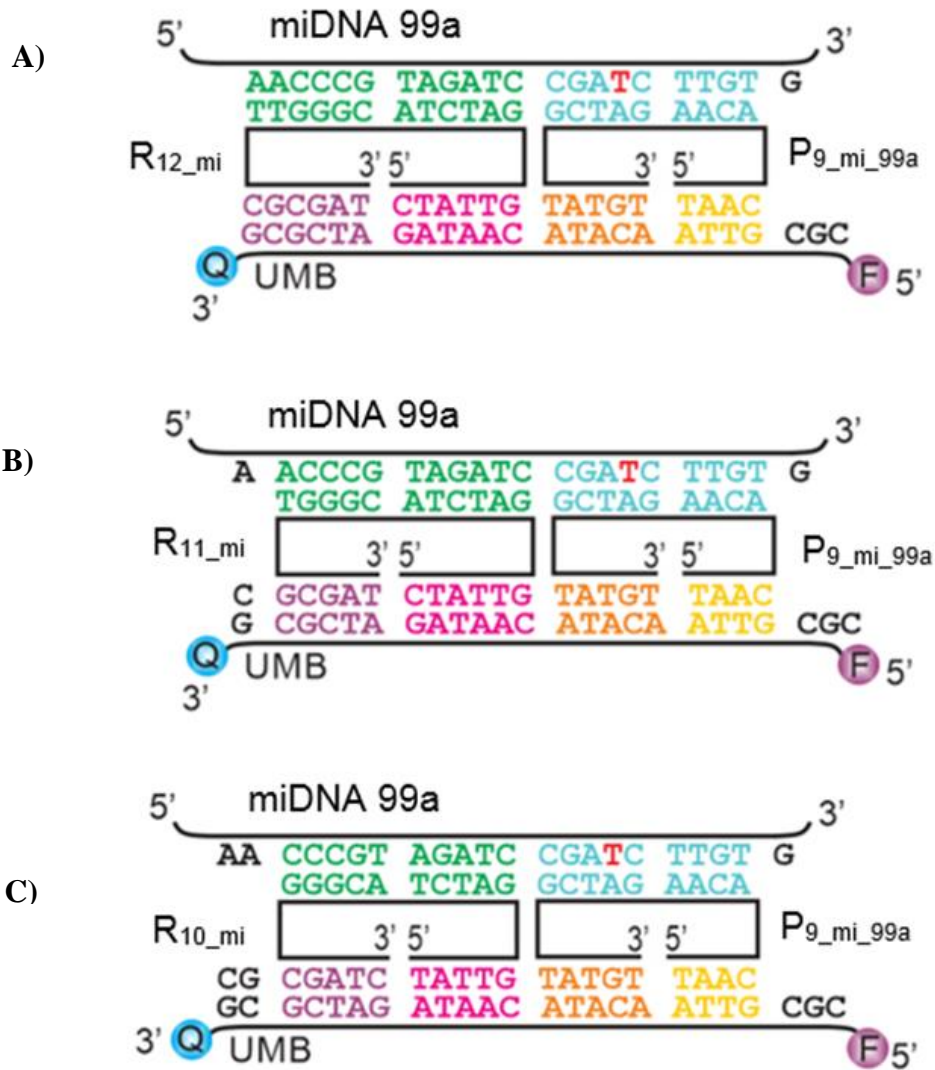

Figure S14. Structures of Owl Sensors in complex with miDNA99a analytes.

## 19. Secondary Structures of miDNA99aa and miDNA100

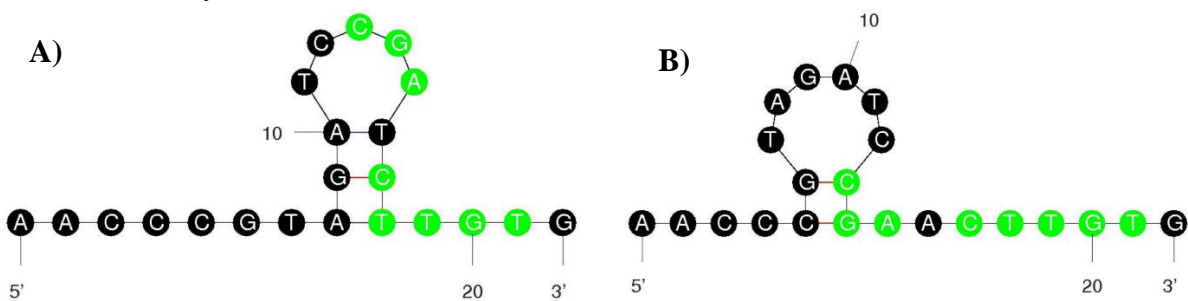

**Figure S15. Secondary structures of miDNA analytes.** The (A) miDNA99a ( $\Delta G = -0.91$  kcal/mol) and (A) miDNA100 ( $\Delta G = -0.14$  kcal/mol) analytes are shown folded at 37°C when folded under the automatic mfold parameters.<sup>22</sup> The green nucleotides indicate the region where  $P_{9\_mi}$  binds. The black nucleotide in the middle of the green region indicates the variable base.

20. Melting temperature of different Owl sensors with miDNA analytes.

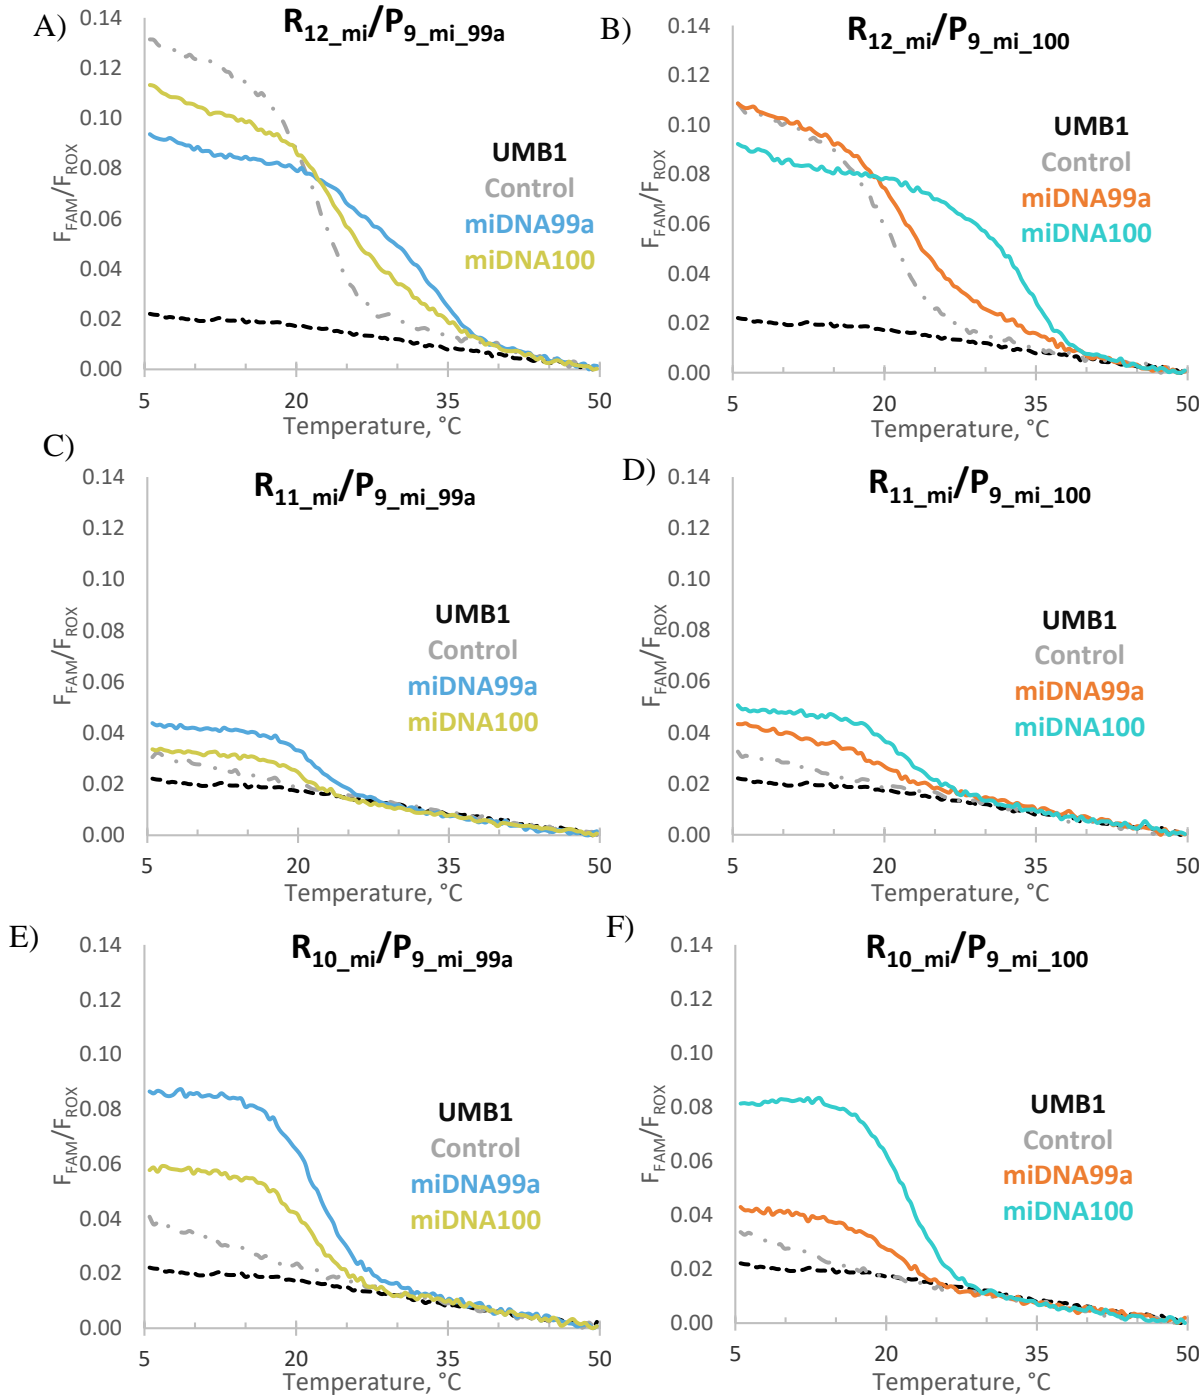

**Figure S16. Melt curves for Owl Sensor specific to miDNA.** Figures A, C, and D show melt curves for an R strand with 12-10 nt analyte binding arms with a P<sub>9</sub> specific to miDNA99a. Panels B, D, and F show differentiation for an R strand with 12-10 nucleotides for R paired with a P<sub>9</sub> specific to miDNA100. Owl Sensors with R<sub>12\_mi</sub> and R<sub>11\_mi</sub> show poor differentiation between matched and mismatched DNA analytes. Here we see again that an R strand that is 10 nucleotides long is best for differentiating mismatches when analyzing DNA analytes. The buffer used contained 50 mM Tris-HCl pH 7.4, 50 mM MgCl<sub>2</sub>, and 0.1% Tween-20.



## 21. Optimized melting temperature conditions for miDNA analytes

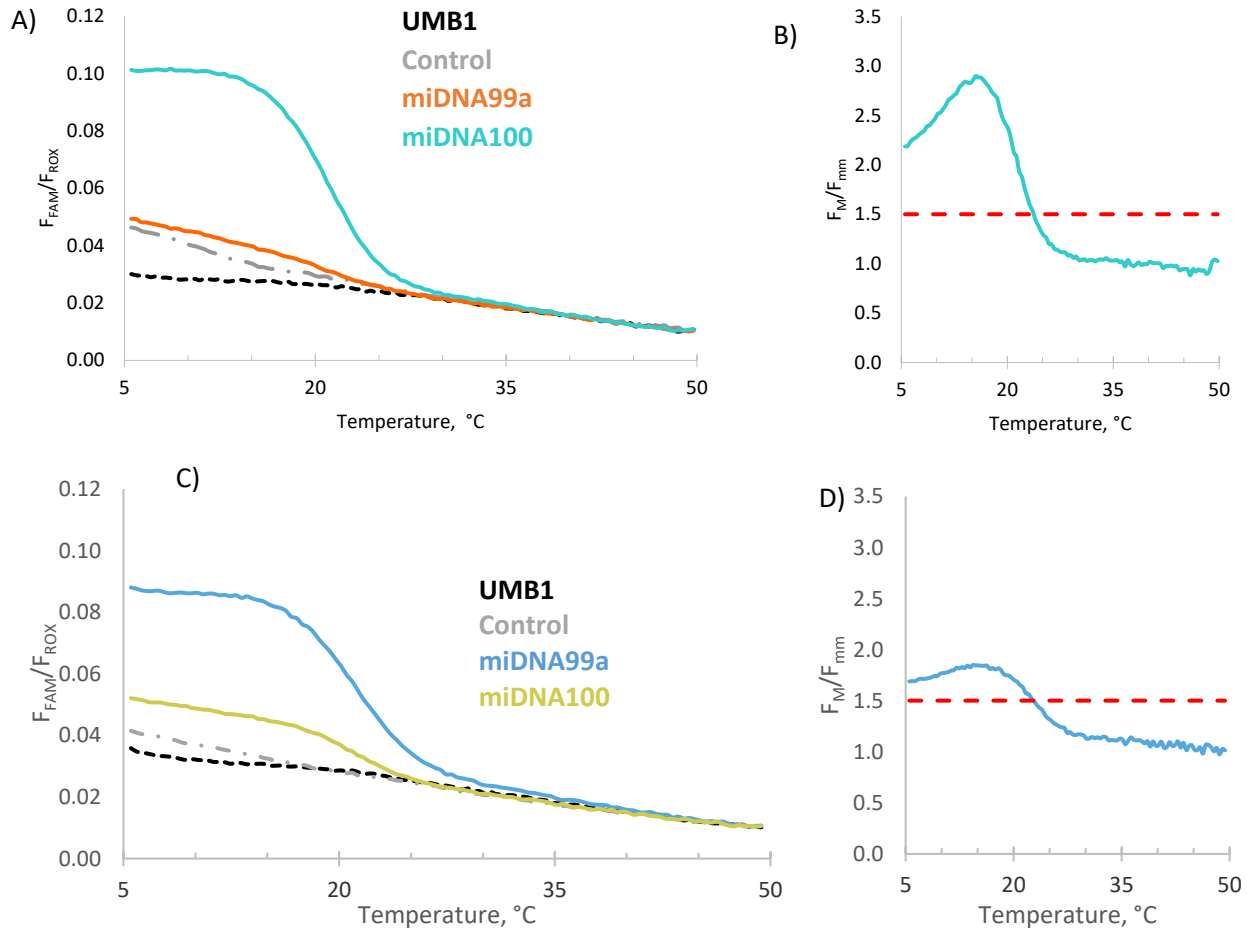

**Figure S17. Optimized melt curves and differentiation of DNA analytes with the  $R_{10\_mi}/P_{9\_mi\_100}$  and  $R_{10\_mi}/P_{9\_mi\_99a}$  Owl Sensors.** A) The melt curve for  $R_{10\_mi}/P_{9\_mi\_100}$  Owl Sensor (specific to **miDNA100** and mismatched with **miDNA99a**) shows excellent differentiation between the matched (teal) and mismatched (orange) analytes. B) The differentiation range extends from 5-23.2°C for Owl Sensor  $R_{10\_mi}/P_{9\_mi\_100}$  Owl Sensor with DNA analytes. C) The melt curve for  $R_{10\_mi}/P_{9\_mi\_99a}$  Owl Sensor (specific to **miDNA99a** and mismatched with **miDNA100**) shows excellent differentiation between the matched (blue) and mismatched (mustard) analytes. D) The differentiation range extends from 5-22.4°C for Owl Sensor  $R_{10\_mi}/P_{9\_mi\_99a}$  Owl Sensor with DNA analytes. The buffer used contained 50 mM Tris-HCl pH 7.4, 40 mM  $MgCl_2$ , and 0.1% Tween-20.

22. Owl Sensors performance with **miRNA99** and **miRNA100** analytes.

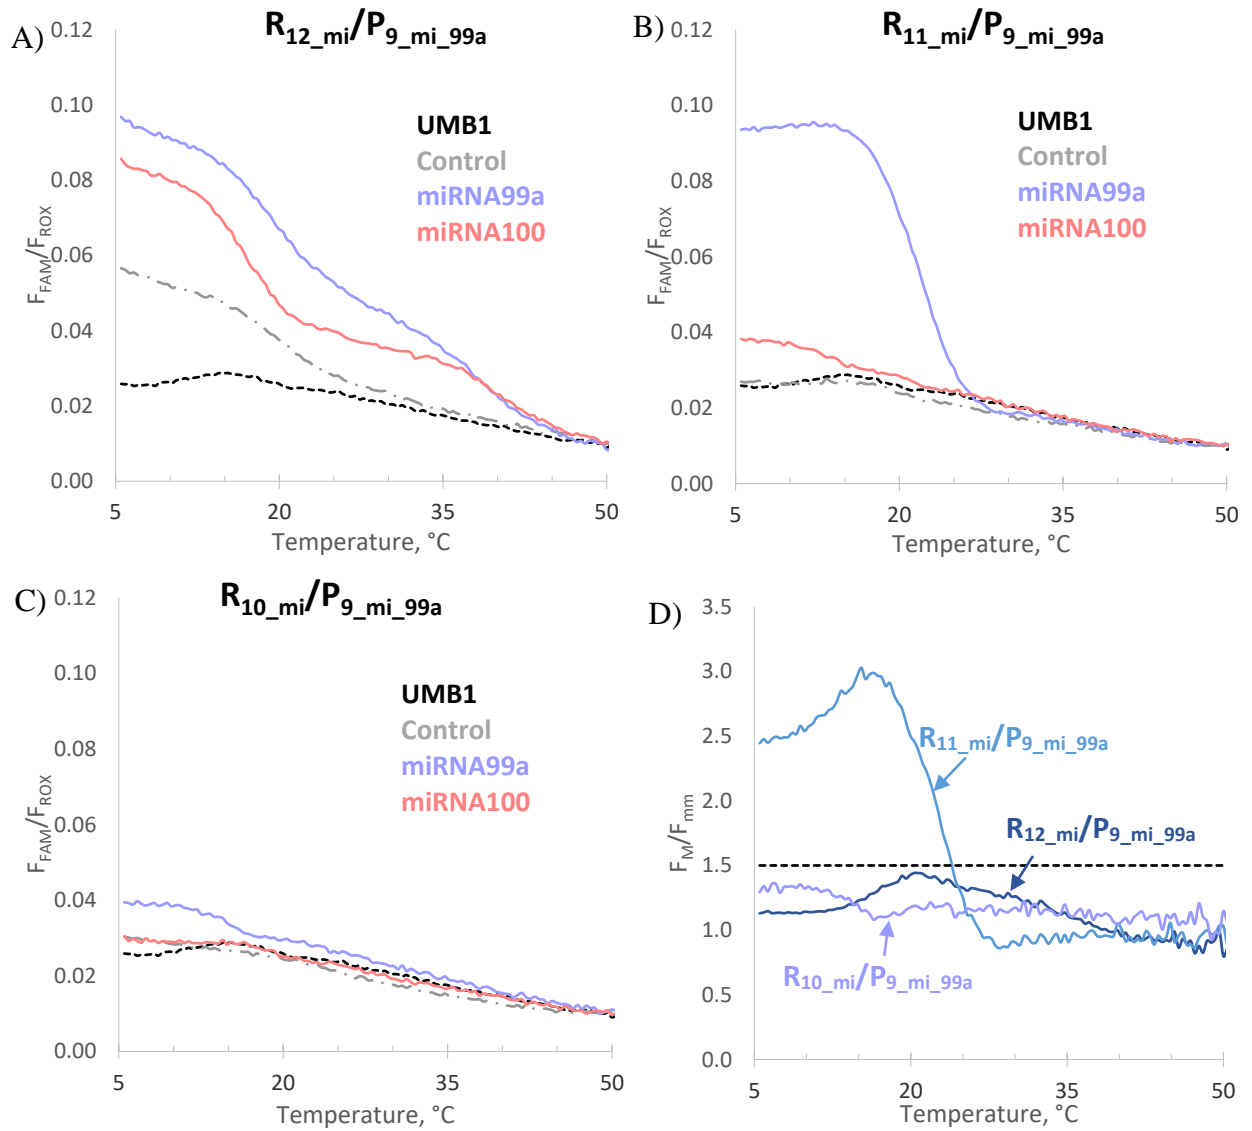

**Figure S18.  $R_{11\_mi}$  is the best R length for differentiating the mismatched analyte in miRNA analytes.**

A, B and C) The melt curves for UMB, the Control, **miRNA99a**, and **miRNA100** are represented by the black dashed, grey dotted dashed, coral, and purple lines, respectively. D) The differentiation range for Owl Sensor  $R_{11\_mi}/P_{9\_mi\_99a}$  Owl Sensor with RNA analytes. The buffer used contained 50 mM Tris-HCl pH 7.4, 40 mM  $MgCl_2$ , and 0.1% Tween-20.

### 23. Optimized melt curves and differentiation of miRNA Analytes

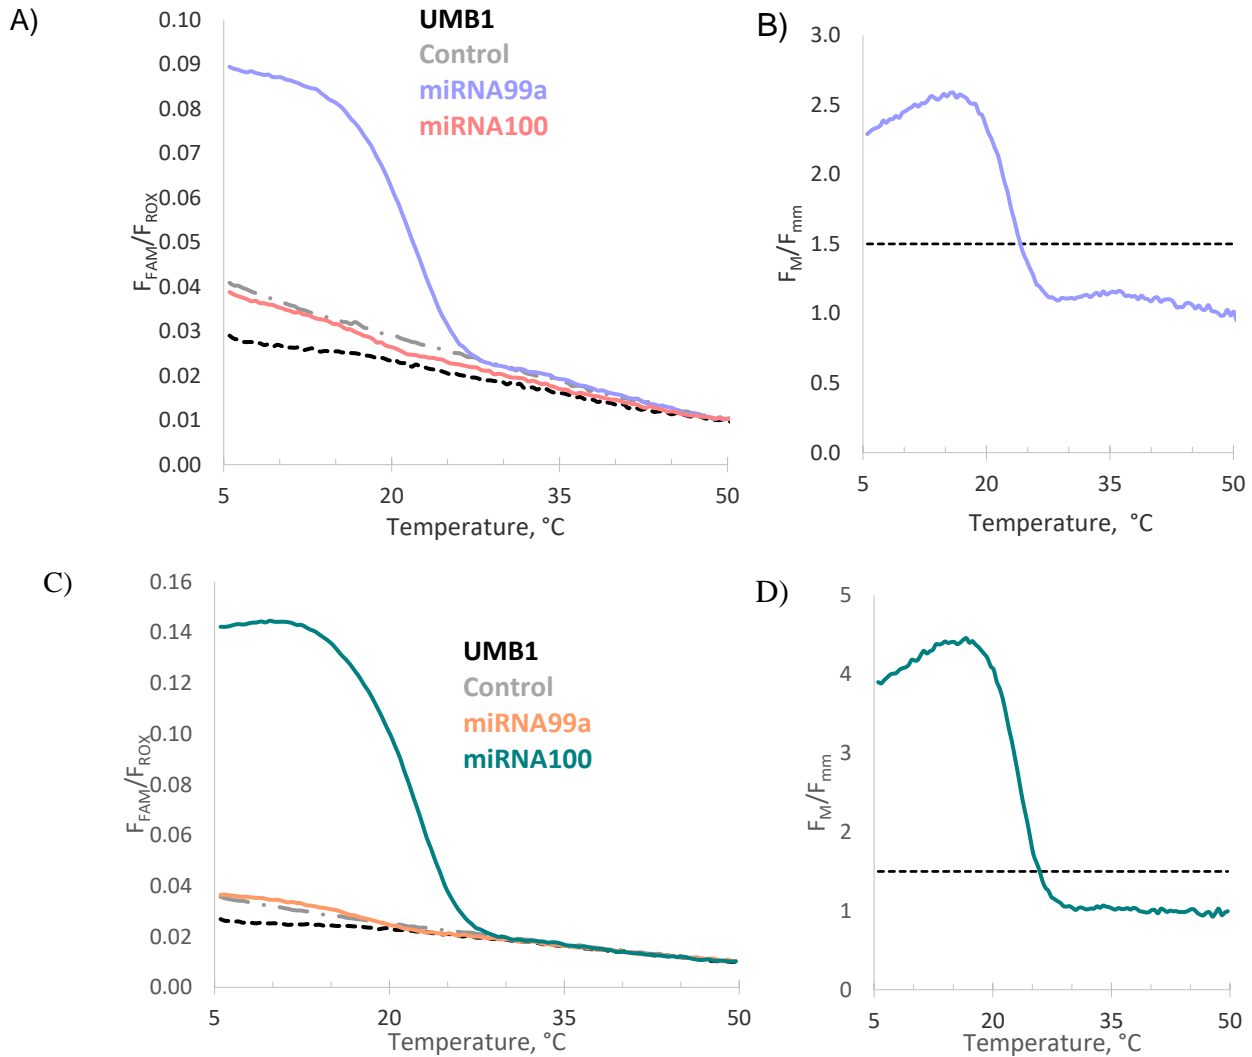

**Figure S19. Optimized melt curve and differentiation of miRNA Analytes.** A) The melt curve for **R<sub>11\_mi</sub>/P<sub>9\_mi\_99a</sub>** shows excellent differentiation between the matched (purple) and mismatched (salmon) analytes. B) The differentiation range for Owl Sensor **R<sub>11\_mi</sub>/P<sub>9\_mi\_99a</sub>**. Owl Sensor with RNA analytes differentiates in the temperature range 5-25.7°C. C) The melt curve for **R<sub>11\_mi</sub>/P<sub>9\_mi\_100</sub>** shows excellent differentiation between the matched (teal) and mismatched (orange) analytes. D) The differentiation range for Owl Sensor **R<sub>11\_mi</sub>/P<sub>9\_mi\_100</sub>** Owl Sensor with RNA analytes extends from 5-24.1°C. The buffer used contained 40 mM Tris-HCl pH 7.4, 40 mM MgCl<sub>2</sub>, and 0.1% Tween-20.

24. Effect of the prescenc of random RNA on the performance of Owl Sensor.

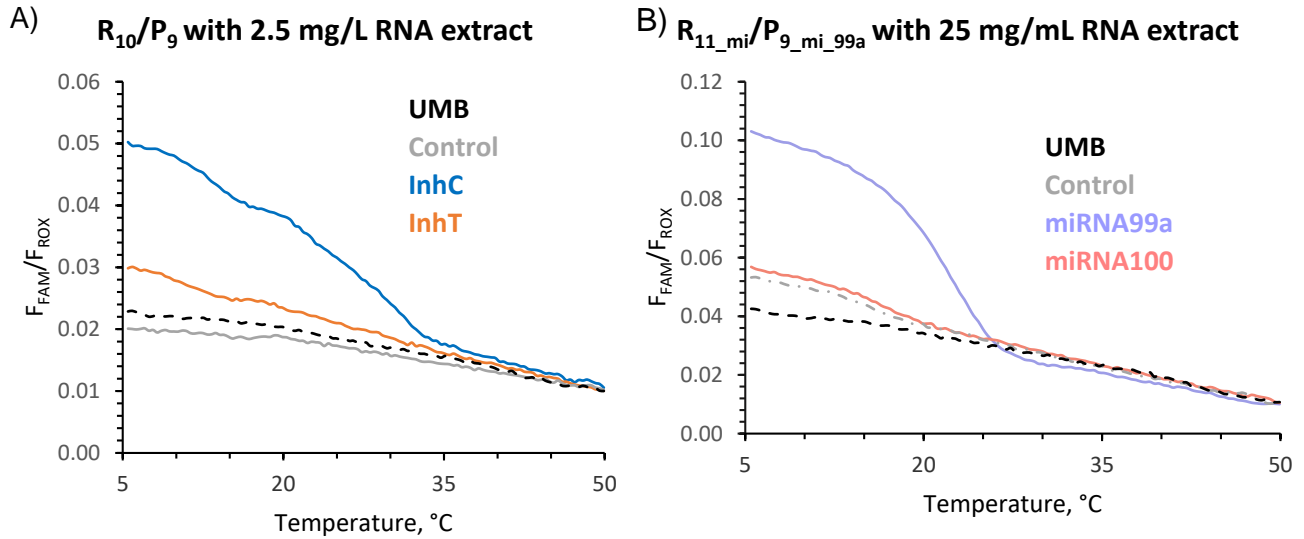

**Figure S20. Performance of Owl sensors in the presence of random RNA.** A) Melting curves for  $R_{10}/P_9$  Owl Sensor ( $R_{10}$ : 5'-TAT TGA GTG GCC CAT CGA TC,  $P_9$ : 5'- TAA CTG TTG TGT CTA TGT; and UMB1, 5'-/FAM/-CGC GTT AAC ATA CAA TAG ATC GCG-/BHQ1/) in the presence of fully matched **InhC** or mismatched **InhT** (orange). Grey dotted-dashed line: no analyte control; black dashed line: **UMB1** only. The samples contained 50 mM Tris-HCl, pH 7.4, 50 mM MgCl<sub>2</sub>, and 0.1% Tween-20 with 50 nM UMB1, 50 nM ROX, 150 nM  $R_{10}$ , 200 nM  $P_9$ , 2.5 mg/L *S.cerevisiae* RNA (Sigma, R8759) and 100 nM analytes. B) Melting curves of the complex of  $R_{11}/P_9$  with fully matched **miRNA99a** or mismatched **miRNA100**. Owl Sensor The samples contained 50 mM Tris-HCl, pH 7.4, 50 mM MgCl<sub>2</sub>, and 0.1% Tween-20 with 50 nM **UMB1**, 50 nM ROX, 150 nM  $R_{10}$ , 200 nM  $P_9$ , 25 mg/L *S.cerevisiae* RNA (Sigma, R8759) and 100 nM analytes. ROX dye was used as an internal control for normalization of fluorescence from different samples.

## 25. References

1. Tyagi, S.; Kramer, F. R. *Nat. Biotechnol.* 1996, 14, 303–308.
2. Kolpashchikov, D. M. *Scientifica* 2012, 2012, 928783.
3. Tsourkas, A.; Behlke, M. A.; Bao, G. *Nucleic Acids Res.* 2002, 30, 4208–4215.
4. [http://www.molecular-beacons.org/MB\\_SC\\_design.html](http://www.molecular-beacons.org/MB_SC_design.html)
5. <http://unafold.rna.albany.edu/?q=mfold/dna-folding-form>
